# Supplementary material for: Heart Failure Therapies following Acute Coronary Syndromes with Reduced Ejection Fraction: Data from the ACSIS Survey
Source: MDPI journal article supplement (doi:10.3390/jpm13061015), 2023-06-19
Supplement: s1 [file s1]

## **Supplemental Data**

**Heart failure therapies following acute coronary syndromes with reduced ejection fraction: Data from the ACSIS survey**

**Supplemental Table S1:** In-hospital characteristics of study population

| Variable                                                   | Overall<br>n=661 | LVEF≤40%<br>n=406 | LVEF 41-49%<br>n=255 | P value | Missing<br>data (%) |
|------------------------------------------------------------|------------------|-------------------|----------------------|---------|---------------------|
| In-hospital LVEF (median [IQR])                            | 40 [35, 45]      | 35 [33, 40]       | 45 [45, 45]          | <0.001  | 0                   |
| Discharge diagnosis:                                       |                  |                   |                      | 0.546   | 0                   |
| NSTEMI                                                     | 286 (43.3)       | 175 (43.1)        | 111 (43.5)           |         |                     |
| STEMI                                                      | 355 (53.7)       | 221 (54.4)        | 134 (52.5)           |         |                     |
| UA                                                         | 20 (3.0)         | 10 (2.5)          | 10 (3.9)             |         |                     |
| Anterior STEMI location (ECG)                              | 223 (62.8)       | 166 (75.1)        | 57 (42.5)            | <0.001  |                     |
| CABG (till hospital discharge)                             | 44 (6.7)         | 27 (6.7)          | 17 (6.7)             | 1.000   | 0                   |
| AICD/CRT                                                   | 10 (1.5)         | 9 (2.2)           | 1 (0.4)              | 0.123   | 0                   |
| Intra-aortic Balloon (IABP)                                | 15 (2.3)         | 11 (2.7)          | 4 (1.6)              | 0.487   |                     |
| <b>STEMI patients (n)</b>                                  | <b>355</b>       | <b>221</b>        | <b>134</b>           |         |                     |
| Angiography followed by:                                   |                  |                   |                      | 0.526   | 8.2                 |
| Primary PCI                                                | 321 (98.5)       | 197 (98.0)        | 124 (99.2)           |         |                     |
| Urgent CABG                                                | 3 (0.9)          | 2 (1.0)           | 1 (0.8)              |         |                     |
| No intervention                                            | 2 (0.6)          | 2 (1.0)           | 0 (0.0)              |         |                     |
| Infarcted related artery:                                  |                  |                   |                      | <0.001  | 9.3                 |
| LMCA                                                       | 2 (0.6)          | 2 (1.0)           | 0 (0.0)              |         |                     |
| LAD                                                        | 206 (64.0)       | 151 (75.5)        | 55 (45.1)            |         |                     |
| LCX                                                        | 48 (14.9)        | 20 (10.0)         | 28 (23.0)            |         |                     |
| RCA                                                        | 63 (19.6)        | 26 (13.0)         | 37 (30.3)            |         |                     |
| Surgical graft                                             | 3 (0.9)          | 1 (0.5)           | 2 (1.6)              |         |                     |
| Number of diseased vessels:                                |                  |                   |                      | 0.292   | 8.5                 |
| No vessels                                                 | 3 (0.9)          | 2 (1.0)           | 1 (0.8)              |         |                     |
| 1 vessel                                                   | 131 (40.3)       | 80 (40.0)         | 51 (40.8)            |         |                     |
| 2 vessels                                                  | 117 (36.0)       | 66 (33.0)         | 51 (40.8)            |         |                     |
| 3 vessels                                                  | 74 (22.8)        | 52 (26.0)         | 22 (17.6)            |         |                     |
| TIMI grade flow before<br>revascularization (median [IQR]) | 0 [0, 2]         | 0 [0, 1]          | 0 [0, 2]             | 0.372   | 11.3                |
| PCI for non-infarct artery                                 | 37 (11.4)        | 26 (12.9)         | 11 (8.9)             | 0.359   | 8.7                 |

AICD, Automatic implantable cardioverter defibrillator; CABG, coronary artery bypass graft; CRT, cardiac resynchronization therapy; ECG, electrocardiography; IQR, interquartile range; LAD, left anterior descending coronary artery; LCX, left circumflex coronary artery; LMCA, left main coronary artery; LVEF, left ventricle ejection fraction; NSTEMI, non-ST segment elevation myocardial infarction; PCI, percutaneous coronary intervention; STEMI, ST-segment elevation myocardial infarction; SVG, saphenous vein graft; UA, unstable angina; RCA, right coronary artery

**Supplemental Table S2:** In-hospital complications of study population

| <b>Variable</b>                                          | <b>Overall<br/>661</b> | <b>LVEF≤40%<br/>406</b> | <b>LVEF 41%-49%<br/>255</b> | <b>P value</b> |
|----------------------------------------------------------|------------------------|-------------------------|-----------------------------|----------------|
| CHF mild-moderate (Killip II)                            | 109 (16.5)             | 81 (20.0)               | 28 (11.0)                   | 0.004          |
| Pulmonary edema (Killip III)                             | 40 (6.1)               | 36 (8.9)                | 4 (1.6)                     | <0.001         |
| Cardiogenic shock (Killip IV)                            | 20 (3.0)               | 16 (4.0)                | 4 (1.6)                     | 0.134          |
| Hemodynamically significant right Ventricular infarction | 8 (1.2)                | 7 (1.7)                 | 1 (0.4)                     | 0.248          |
| Post MI angina/re-ischemia                               | 6 (0.9)                | 3 (0.7)                 | 3 (1.2)                     | 0.872          |
| Stent thrombosis (definite/probable/possible)            | 5 (0.8)                | 4 (1.0)                 | 1 (0.4)                     | 0.695          |
| MR moderate - severe                                     | 17 (2.6)               | 13 (3.2)                | 4 (1.6)                     | 0.299          |
| Pericarditis                                             | 7 (1.1)                | 6 (1.5)                 | 1 (0.4)                     | 0.349          |
| Sustained VT (>125 bpm)                                  | 8 (1.2)                | 7 (1.7)                 | 1 (0.4)                     | 0.246          |
| Primary VF                                               | 12 (1.8)               | 6 (1.5)                 | 6 (2.4)                     | 0.602          |
| Secondary VF                                             | 3 (0.5)                | 2 (0.5)                 | 1 (0.4)                     | 1.000          |
| New Atrial Fibrillation.                                 | 33 (5.0)               | 26 (6.4)                | 7 (2.7)                     | 0.055          |
| High degree (2 <sup>nd</sup> or 3 <sup>rd</sup> ) AVB    | 4 (0.6)                | 2 (0.5)                 | 2 (0.8)                     | 1.000          |
| Asystole                                                 | 5 (0.8)                | 3 (0.7)                 | 2 (0.8)                     | 1.000          |
| Stroke                                                   | 4 (0.6)                | 3 (0.7)                 | 1 (0.4)                     | 0.965          |
| Acute renal failure                                      | 55 (8.4)               | 41 (10.1)               | 14 (5.5)                    | 0.051          |
| Bleeding                                                 | 18 (2.7)               | 15 (3.7)                | 3 (1.2)                     | 0.090          |
| Free wall rupture                                        | 1 (0.2)                | 1 (0.2)                 | 0 (0.0)                     | 1.000          |

AVB, atrioventricular block; CHF, congestive heart failure; MI, myocardial infarction; MR, mitral regurgitation, VF, ventricular fibrillation; VT, ventricular tachycardia

**Supplemental Table S3:** Clinical adverse outcomes post-discharge, according to the number of heart failure therapeutic groups

| No. of therapeutic groups:                            | EF≤40%        |               |                | EF 41%-49%    |               |               |
|-------------------------------------------------------|---------------|---------------|----------------|---------------|---------------|---------------|
|                                                       | 0-1           | 2             | 3-4            | 0-1           | 2             | 3-4           |
| <b>Patients with 90-day follow-up (n=547)</b>         | 31            | 130           | 167            | 51            | 93            | 75            |
| Rehospitalizations - ACS (cardiac, unscheduled) * (%) | 0             | 6<br>(4.6%)   | 3<br>(1.8%)    | 0             | 0             | 3<br>(4%)     |
| Rehospitalizations - HF (%)                           | 2<br>(6.9%)   | 2<br>(1.6%)   | 8<br>(4.8%)    | 0             | 1<br>(1.1%)   | 1<br>(1.3%)   |
| ACS (UA/NSTEMI/STEMI/ Stent thrombosis) (%)           | 0             | 8<br>(6.2%)   | 6<br>(3.6%)    | 0             | 2<br>(2.2%)   | 3<br>(4%)     |
| Aborted SCD (%)                                       | 0             | 1<br>(0.8%)   | 0              | 0             | 0             | 0             |
| 90-day all-causes mortality (%)                       | 0             | 1<br>(0.8%)   | 0              | 1<br>(2%)     | 0             | 0             |
| Combined outcome 90-days (HF, ACS, any death) (%)     | 2<br>(6.5%)   | 9<br>(6.9%)   | 14<br>(8.4%)   | 1<br>(2%)     | 3<br>(3.2%)   | 4<br>(5.3%)   |
| Referral to rehabilitation (%)                        | 19<br>(67.9%) | 94<br>(75.2%) | 121<br>(73.3%) | 33<br>(67.3%) | 73<br>(78.5%) | 48<br>(65.8%) |
| Participation in rehabilitation (or scheduled) (%)    | 9<br>(33.3%)  | 44<br>(36.4%) | 53<br>(32.7%)  | 11<br>(24.4%) | 37<br>(42.5%) | 21<br>(29.6%) |
| <b>All patients (n=661)</b>                           | 47            | 153           | 206            | 57            | 116           | 82            |
| 30-day MACE** (%)                                     | 2<br>(4.3%)   | 14<br>(9.2%)  | 18<br>(8.7%)   | 4<br>(7%)     | 8<br>(6.9%)   | 6<br>(7.3%)   |
| 1-year mortality*** (%)                               | 3<br>(6.4%)   | 7<br>(4.6%)   | 7<br>(3.4%)    | 1<br>(1.8%)   | 2<br>(1.7%)   | 1<br>(1.2%)   |

Stratified by number of HF therapeutic groups [(a) any ACEI or ARB or ARNI, (b) MRA, (c) SGLT2I, (d) Beta blockers], prescribed at discharge or 90-day follow-up. All pairwise comparisons were non-significant

\* Refers to the first re-hospitalization only

\*\* MACE (30 days: death/UA/MI/CVA/stent thrombosis/urgent revascularization)

\*\*\* Excluding in-hospital death

ACS, acute coronary syndrome; CVA, cerebrovascular accident; HF, heart failure; MACE, major adverse cardiovascular events; NSTEMI, non-ST segment elevation myocardial infarction; SCD, sudden cardiac death; STEMI, ST-segment elevation myocardial infarction; UA, unstable angina

**Supplemental Table S4:** Clinical outcomes according to the use of ARNI or SGLT2I at discharge or 90-Days follow-up

|                                                         | Overall   | ARNI/SGLT2I<br>No | ARNI/SGLT2I<br>Yes | P value |
|---------------------------------------------------------|-----------|-------------------|--------------------|---------|
| <b><u>Patients with available 90-day follow-up*</u></b> |           |                   |                    |         |
| <b>n</b>                                                | 547       | 387               | 160                |         |
| Rehospitalizations - ACS (cardiac, unscheduled) * (%)   | 12 (2.2%) | 9 (2.3%)          | 3 (1.9%)           | 0.995   |
| Rehospitalizations - HF (%)                             | 14 (2.6%) | 10 (2.6%)         | 4 (2.5%)           | 1       |
| ACS (UA/NSTEMI/STEMI/ Stent thrombosis) (%)             | 19 (3.5%) | 13 (3.4%)         | 6 (3.8%)           | 1       |
| Aborted SCD (%)                                         | 1 (0.2%)  | 1 (0.3%)          | 0                  | 1       |
| 90-day any mortality (%)                                | 2 (0.4%)  | 2 (0.5%)          | 0                  | 0.895   |
| Combined outcome 90-days (HF, ACS, any death) (%)       | 33 (6%)   | 23 (5.9%)         | 10 (6.2%)          | 1       |
| <b><u>All patients</u></b>                              |           |                   |                    |         |
|                                                         | 661       | 478               | 163                |         |
| 30-day MACE** (%)                                       | 52 (7.9%) | 37 (7.7%)         | 15 (8.2%)          | 0.973   |
| 1-year mortality*** (%)                                 | 21 (3.2%) | 15 (3.1%)         | 6 (3.3%)           | 1       |

\* Refers to the first re-hospitalization only

\*\* MACE (30 days: death/UA/MI/CVA/stent thrombosis/urgent revascularization)

\*\*\* Excluding in-hospital death

ACS, acute coronary syndrome; CVA, cerebrovascular accident; HF, heart failure; MACE, major adverse cardiovascular events; NSTEMI, non-ST segment elevation myocardial infarction; SCD, sudden cardiac death; STEMI, ST-segment elevation myocardial infarction; UA, unstable angina
